# Supplementary material for: Targeted Sequencing of Pancreatic Adenocarcinomas from Patients with Metachronous Pulmonary Metastases
Source: MDPI journal article supplement (doi:10.3390/genes11121391), 2020-11-24
Supplement: s1 [file s1]

## Supplementary Figures

### Targeted Sequencing of Pancreatic Adenocarcinomas from Patients with Metachronous Pulmonary Metastases

Viktor Hlavac<sup>1,2</sup>, Beatrice Mohelnikova-Duchonova<sup>3</sup>, Martin Lovecek<sup>4</sup>, Jiri Ehrmann<sup>5</sup>, Veronika Brynychova<sup>1,2</sup>, Katerina Kolarova<sup>3</sup> and Pavel Soucek<sup>1,2</sup>

<sup>1</sup>*Biomedical Center, Faculty of Medicine in Pilsen, Charles University, Pilsen, Czech Republic;*

<sup>2</sup>*Toxicogenomics Unit, National Institute of Public Health, Prague, Czech Republic;*

<sup>3</sup>*Department of Oncology, Institute of Molecular and Translational Medicine, Faculty of Medicine and Dentistry, Palacky University, Olomouc, Czech Republic;*

<sup>4</sup>*Department of Surgery I, University Hospital Olomouc and Faculty of Medicine and Dentistry, Palacky University, Olomouc, Czech Republic;*

<sup>5</sup>*Department of Clinical and Molecular Pathology, University Hospital Olomouc and Faculty of Medicine and Dentistry, Palacky University, Olomouc, Czech Republic.*

**Address for correspondence:** Viktor Hlavac, PhD, Laboratory of Pharmacogenomics, Biomedical Center, Faculty of Medicine in Pilsen, Charles University, alej Svobody 76, 323 00 Pilsen, Czech Republic, phone/fax+420-377-593-840; e-mail: viktor.hlavac@lfp.cuni.cz; <http://www.biomedic-plzen.cz/en>

**Supplementary Figure S1:** IGV comparison of sequencing and ddPCR results showing reads with uncalled alternative bases

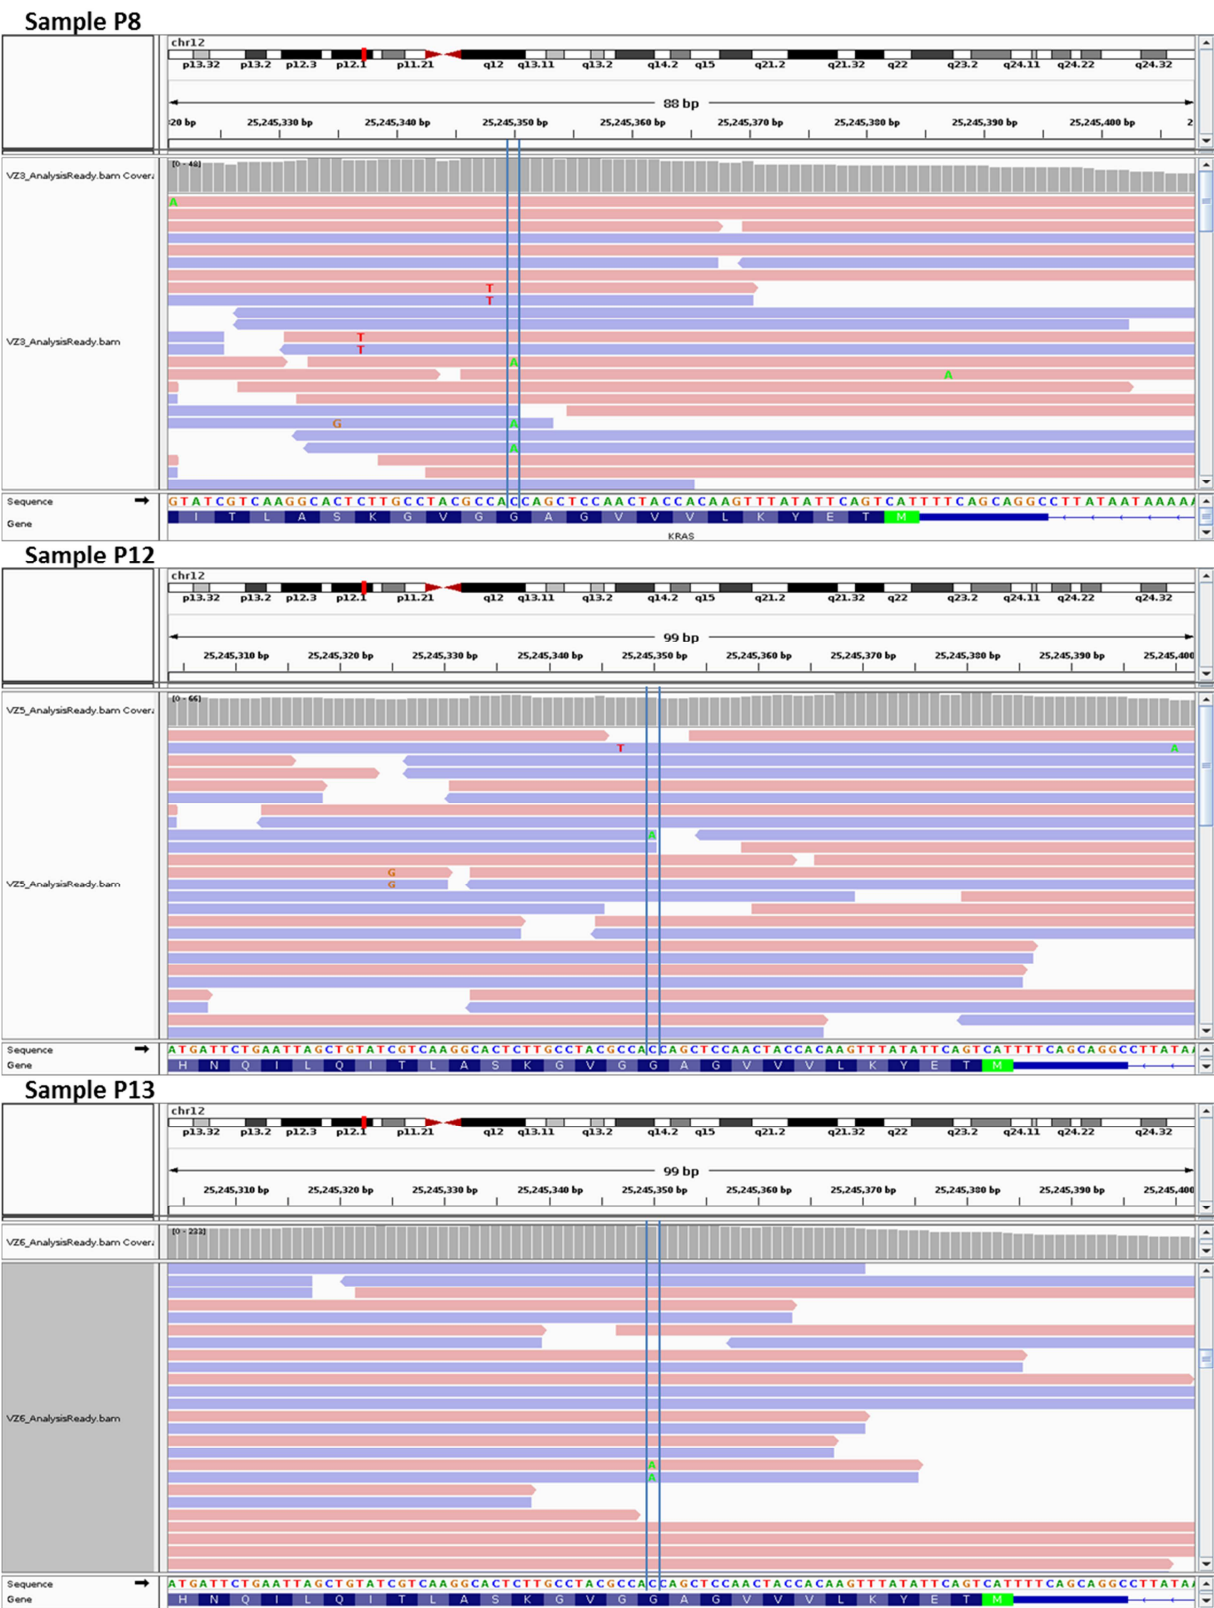

**Supplementary Figure S2:** Oncoplot of primary tumors depicting genes significantly mutated in Broad Institute PDAC (A) and LUAD (B) cohorts

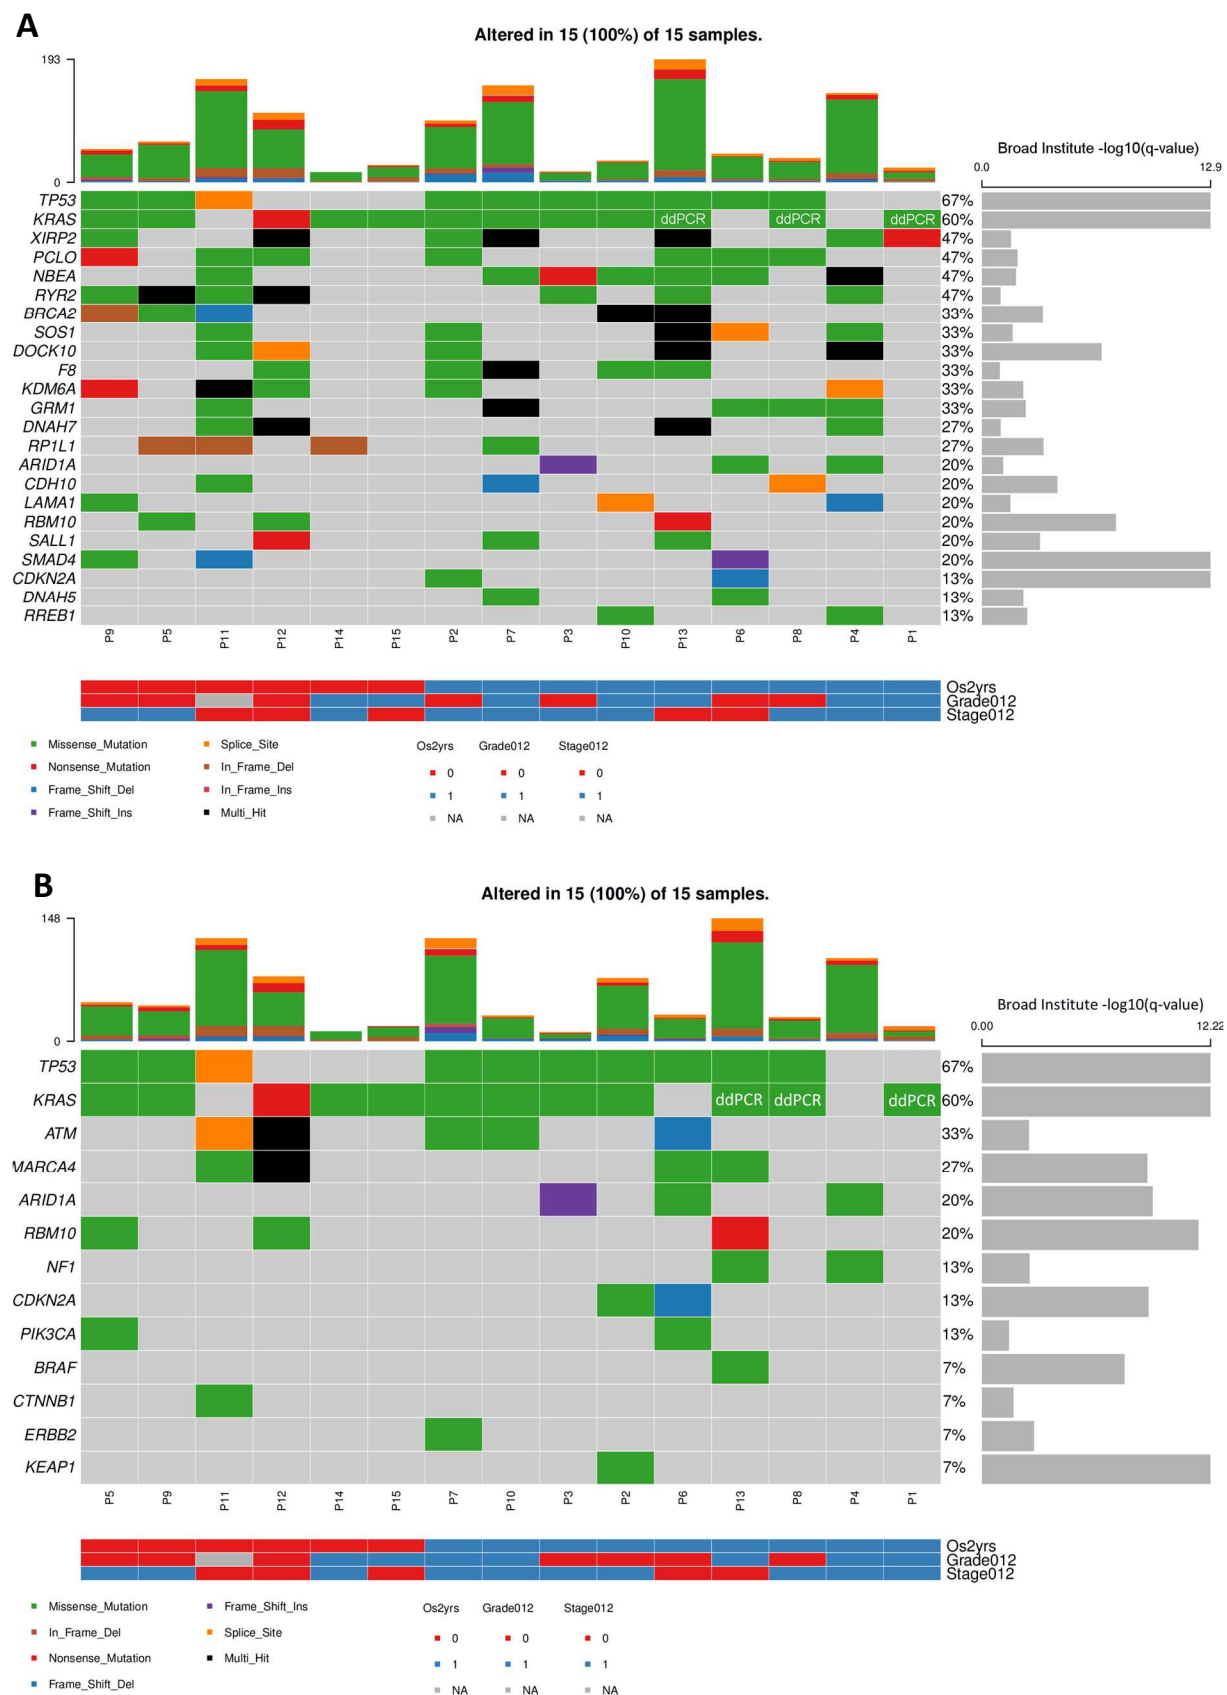

**Supplementary Figure S3:** The summary of the distribution of variants in three sample pairs of primary tumors and matched pulmonary metastases

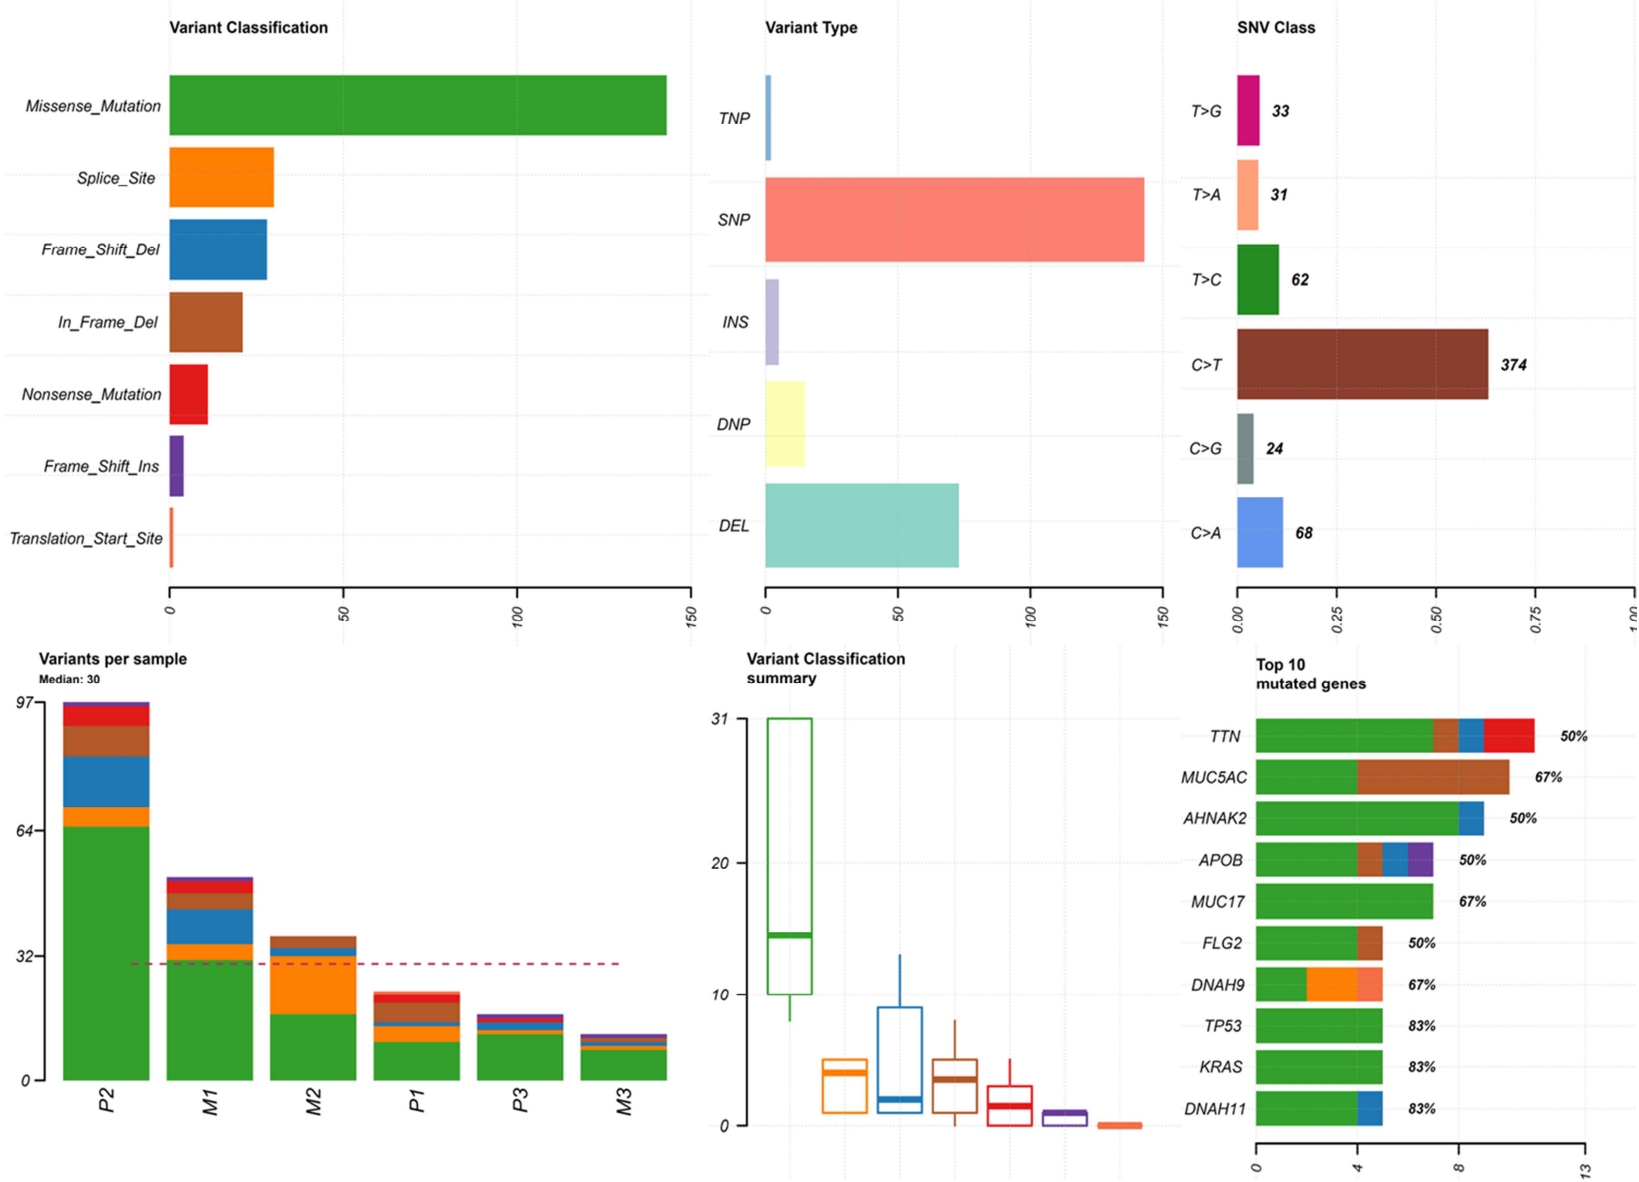

**Supplementary Figure S4:** Oncoplot of comparison between primary tumors and matched pulmonary metastases depicting genes significantly mutated in Broad Institute PDAC (A) and LUAD (B) cohorts

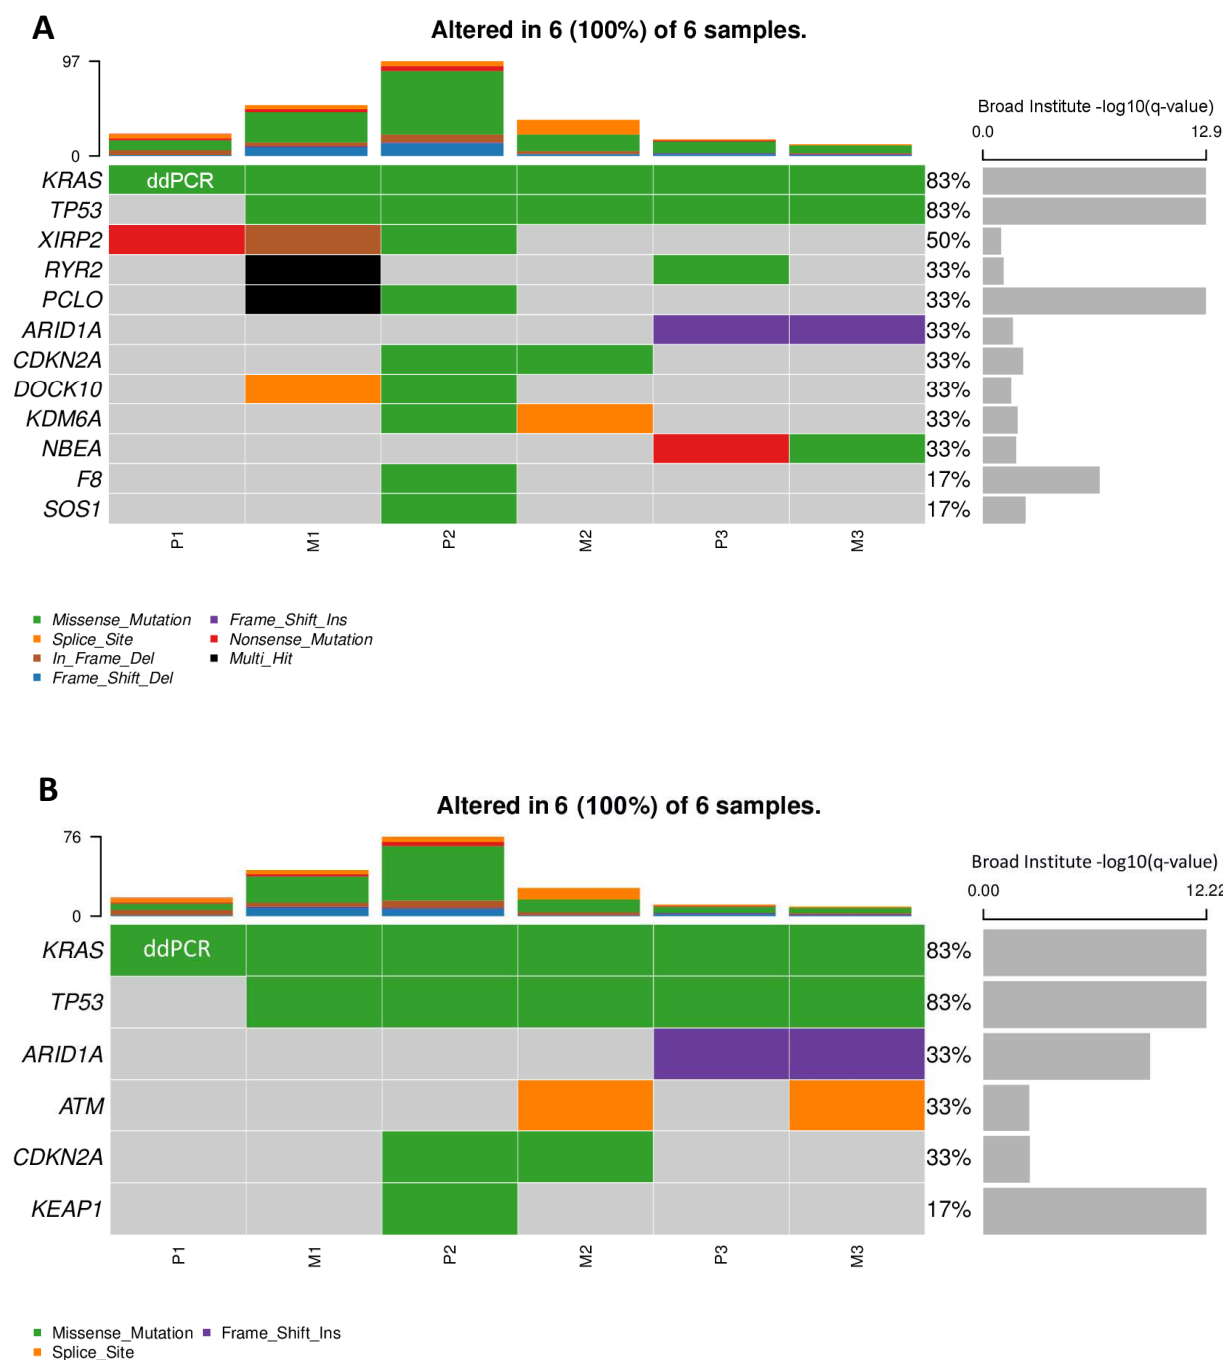

**Supplementary Figure S5:** Overall survival plot of available TCGA datasets stratified by KRAS and TP53 mutation status (cBioPortal, refs. [40,41])

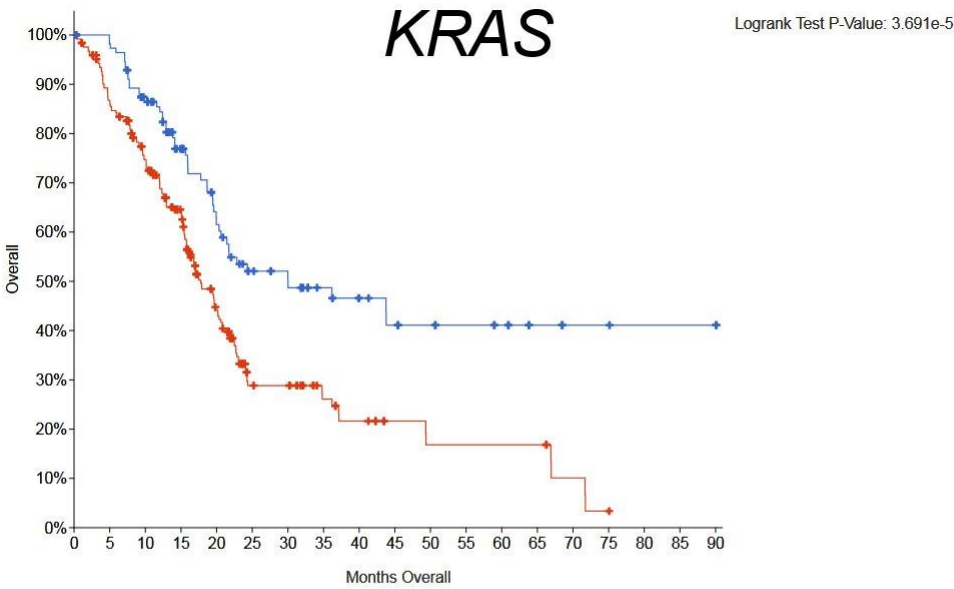

Overall

■ Altered group

■ Unaltered group

|                 | Number of Cases, Total | Number of Cases, Deceased | Median Months Overall |
|-----------------|------------------------|---------------------------|-----------------------|
| Altered group   | 254                    | 151                       | 17.79                 |
| Unaltered group | 114                    | 48                        | 30.02                 |

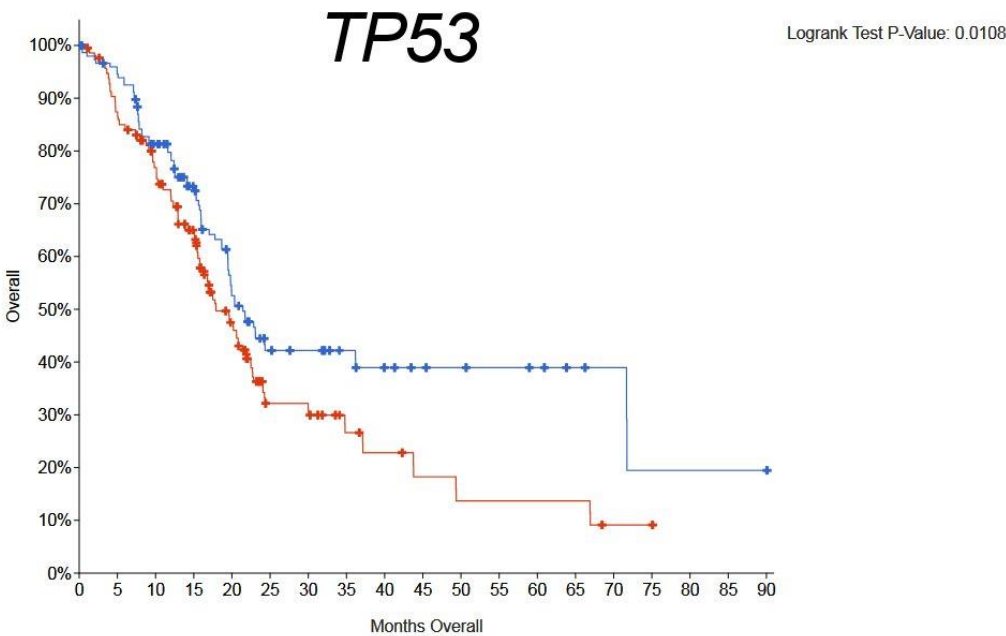

Overall

■ Altered group

■ Unaltered group

|                 | Number of Cases, Total | Number of Cases, Deceased | Median Months Overall |
|-----------------|------------------------|---------------------------|-----------------------|
| Altered group   | 212                    | 126                       | 17.92                 |
| Unaltered group | 156                    | 73                        | 21.44                 |
